# Supplementary material for: Advances in the syntheses, mechanisms and applications of room-temperature phosphorescent carbon dots
Source: Royal Society of Chemistry journal article supplement (doi:10.1039/d4tc04759a), 2024-12-27
Supplement: d4tc04759a1.pdf [file d4tc04759a1.pdf]

## Supplementary Information

**Table S1 The comparison of common RTP materials**

| Type                                         | Wavelength range                                                                                                                                | Lifetime range            | QY range | Morphology     | Remarks                                                                                                                      |
|----------------------------------------------|-------------------------------------------------------------------------------------------------------------------------------------------------|---------------------------|----------|----------------|------------------------------------------------------------------------------------------------------------------------------|
| Metal Ion<br>(Rare earth or transient metal) | 420-1300 nm                                                                                                                                     | 6 s-18 day<br>(Afterglow) | -        | Mostly crystal | Ultralong lifetime; good photostability; sensitive to moisture; requirement of activators; poor machinability <sup>1-3</sup> |
| <b>Inorganic</b>                             | 700 nm                                                                                                                                          |                           |          |                |                                                                                                                              |
| Inorganic cluster<br>(fullerene etc.)        | (Mo <sub>6</sub> I <sub>8</sub> <sup>4</sup> ), >700 nm<br>(Re <sub>6</sub> Se <sub>8</sub> <sup>5</sup> ), 800 nm<br>(Fullerene <sup>6</sup> ) | 0.002-0.189 ms            | 1.5-53%  | Nanocluster    | Good photostability and biocompatible <sup>1-3</sup>                                                                         |

|                                           |                         |                                                      |                                                                  |                  |                                                    |                                                                                                                   |
|-------------------------------------------|-------------------------|------------------------------------------------------|------------------------------------------------------------------|------------------|----------------------------------------------------|-------------------------------------------------------------------------------------------------------------------|
|                                           | Inorganic quantum dots  | 1045-1130 nm<br>(ClSe quantum dots <sup>7, 8</sup> ) | 0.186-0.336 ms                                                   | 12.4-42.7%       | Nanodot,<br>Nanotube                               | —                                                                                                                 |
| <b>Organic</b>                            | Organic molecule        | Visible light to NIR I                               | Microsecond - sub second level<br>(afterglow: 7h by trap states) | <52.1%           | Crystal, solution, thin film, powder and aggregate | Relatively poor photostability; sensitive to oxygen; tunable wavelength; low QY <sup>1, 9-13</sup>                |
|                                           | Polymer & supramolecule | Visible light to NIR I                               | Microsecond - second level                                       | <76%             | Thin film, cocrystal and cluster                   | Good photostability; tunable wavelength; higher QY and longer lifetime than organic molecules <sup>1, 13-17</sup> |
| <b>Inorganic-Organic hybrid materials</b> | Metal organic complex   | Visible light to NIR I                               | Sub microsecond - millisecond level                              | Up to near-unity | Crystal, solution, thin film, powder and aggregate | Easy to process; high QY; relatively poor photostability; short lifetime suitable for OLED <sup>1, 18, 19</sup>   |

---

|                                 |                         |                                                                   |                  |                       |                                                                                                                        |
|---------------------------------|-------------------------|-------------------------------------------------------------------|------------------|-----------------------|------------------------------------------------------------------------------------------------------------------------|
| Metal organic framework         | Bule to NIR             | Microsecond - second level                                        | <80.6%           | Nanocrystal           | Thermal and photo stability, long lifetime and high QY, stimulus responsive phosphorescence <sup>1, 20,</sup><br>21    |
| Organic-inorganic metal halides | Green, Yellow, Red, NIR | Microsecond - millisecond level                                   | Up to near-unity | Crystal and thin film | Thermal and photo stability; sensitive to moisture; high QY <sup>1,</sup><br>22, 23                                    |
| Carbon Dots                     | Ultraviolet to NIR I    | Microsecond - second level (afterglow: hour level by trap states) | Most <50%        | Nanodots              | Thermal and photo stability; long lifetime; relatively low QY; biocompatible; low toxic; cheap <sup>1,</sup><br>24, 25 |

---

## References

1. X. Yang, G. I. N. Waterhouse, S. Lu and J. Yu, *Chemical Society Reviews*, 2023, **52**, 8005-8058.
2. L. Yang, S. Gai, H. Ding, D. Yang, L. Feng and P. Yang, *Advanced Optical Materials*, 2023, **11**.
3. Z. Xia, Z. Xu, M. Chen and Q. Liu, *Dalton Transactions*, 2016, **45**, 11214-11232.

4. M. Koncošová, M. Rumlová, R. Mikyšková, M. Reiniš, J. Zelenka, T. Ruml, K. Kirakci and K. Lang, *Journal of Materials Chemistry B*, 2022, **10**, 3303-3310.
5. S. David, H. J. Chang, C. Lopes, C. Brännlund, B. Le Guennic, G. Berginc, E. Van Stryland, M. V. Bondar, D. Hagan, D. Jacquemin, C. Andraud and O. Maury, *Chemistry – A European Journal*, 2021, **27**, 3517-3525.
6. C. Baleizão and M. N. Berberan - Santos, *ChemPhysChem*, 2011, **12**, 1247-1250.
7. B. Chang, H. Zhu, Y. Wu, S. Wu, L. Zhang, C. Qu, Y. Ren and Z. Cheng, *Advanced Optical Materials*, 2021, **9**.
8. B. Chang, D. Li, Y. Ren, C. Qu, X. Shi, R. Liu, H. Liu, J. Tian, Z. Hu, T. Sun and Z. Cheng, *Nature Biomedical Engineering*, 2021, **6**, 629-639.
9. Y. Xia, Y. Du, Q. Xiang and M. G. Humphrey, *New Journal of Chemistry*, 2021, **45**, 4930-4933.
10. Z. Cong, M. Han, Y. Fan, Y. Fan, K. Chang, L. Xiao, Y. Zhang, X. Zhen, Q. Li and Z. Li, *Materials Chemistry Frontiers*, 2022, **6**, 1606-1614.
11. S. Kuno, H. Akeno, H. Ohtani and H. Yuasa, *Physical Chemistry Chemical Physics*, 2015, **17**, 15989-15995.
12. Z. He, W. Zhao, J. W. Y. Lam, Q. Peng, H. Ma, G. Liang, Z. Shuai and B. Z. Tang, *Nature Communications*, 2017, **8**.
13. Kenry, C. Chen and B. Liu, *Nature Communications*, 2019, **10**.
14. N. Gan, H. Shi, Z. An and W. Huang, *Advanced Functional Materials*, 2018, **28**.
15. X. Ma, C. Xu, J. Wang and H. Tian, *Angewandte Chemie International Edition*, 2018, **57**, 10854-10858.

16. J. Samonina-Kosicka, C. A. DeRosa, W. A. Morris, Z. Fan and C. L. Fraser, *Macromolecules*, 2014, **47**, 3736-3746.
17. X. Chen, C. Xu, T. Wang, C. Zhou, J. Du, Z. Wang, H. Xu, T. Xie, G. Bi, J. Jiang, X. Zhang, J. N. Demas, C. O. Trindle, Y. Luo and G. Zhang, *Angewandte Chemie International Edition*, 2016, **55**, 9872-9876.
18. R. C. Evans, P. Douglas and C. J. Winscom, *Coordination Chemistry Reviews*, 2006, **250**, 2093-2126.
19. Z. A. Yan, C. Yin, H. Tian and X. Ma, *Angewandte Chemie International Edition*, 2024, DOI: 10.1002/anie.202417397.
20. X. Yang and D. Yan, *Chemical Communications*, 2017, **53**, 1801-1804.
21. H. Liu, W. Ye, Y. Mu, H. Ma, A. Lv, S. Han, H. Shi, J. Li, Z. An, G. Wang and W. Huang, *Advanced Materials*, 2021, **34**.
22. Z. Qi, B. Zhou and D. Yan, *Materials Chemistry Frontiers*, 2023, **7**, 3475-3493.
23. Y. Dong, Y. Han, R. Chen, Y. Lin and B.-B. Cui, *Journal of Luminescence*, 2022, **249**.
24. S. Zhou, F. Wang, N. Feng, A. Xu, X. Sun, J. Zhou and H. Li, *Small*, 2023, **19**.
25. C. Wang, Y. Chen, Y. Xu, G. Ran, Y. He and Q. Song, *ACS Applied Materials & Interfaces*, 2020, **12**, 10791-10800.
